# Supplementary material for: Co-ultramicronized Palmitoylethanolamide/Luteolin Promotes the Maturation of Oligodendrocyte Precursor Cells
Source: PubMed Central journal article supplement (PMC4649338; doi:10.1038/srep16676), 2015-11-18
Supplement: srep16676-s1.pdf [file srep16676-s1.pdf]

## **Supplementary Information**

### **Co-ultramicrosized Palmitoylethanolamide / Luteolin Promotes the Maturation of Oligodendrocyte Precursor Cells**

Massimo Barbierato, Laura Facci, Carla Marinelli, Morena Zusso, Carla Argentini,  
Stephen D. Skaper and Pietro Giusti

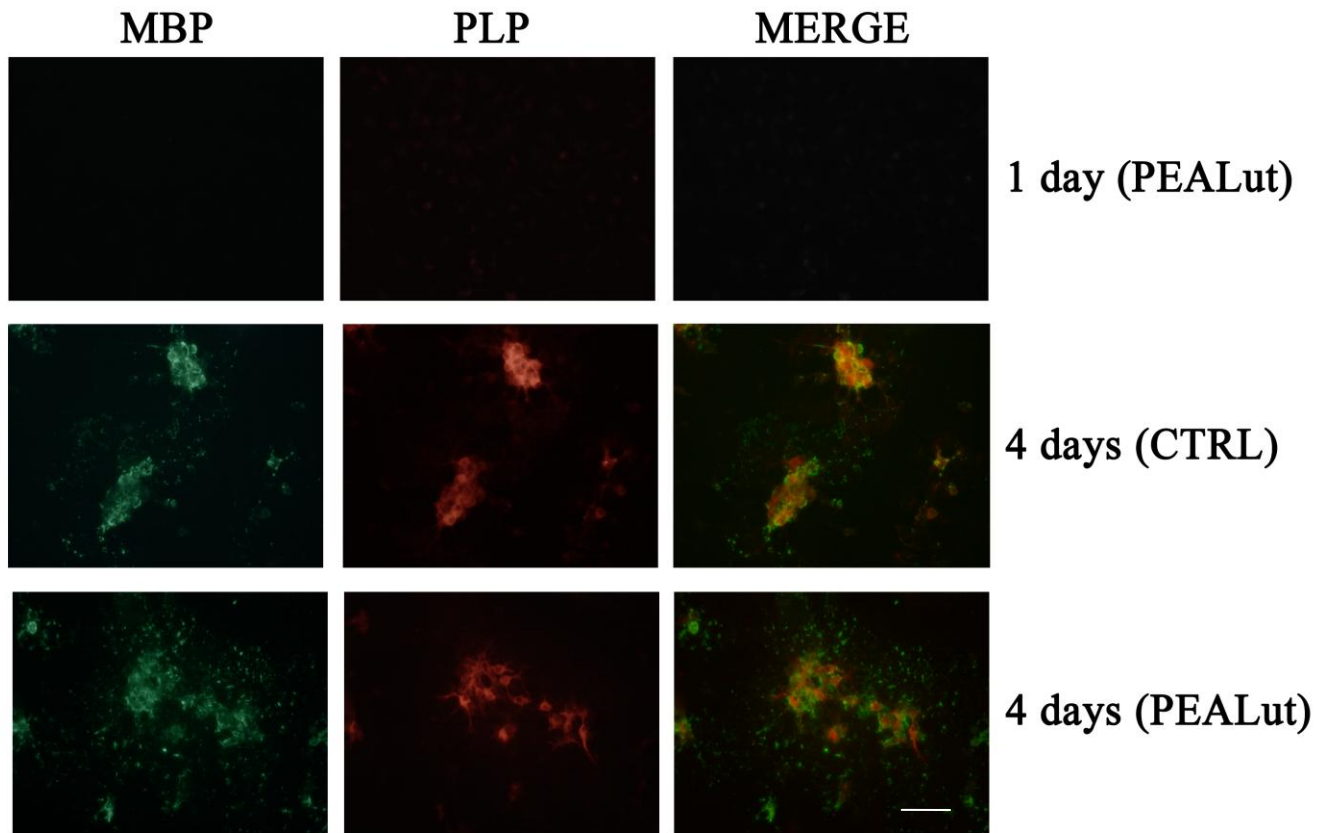

**Supplementary Figure S1.** Co-ultramicrosized PEA/luteolin promotes the morphological development of cortical oligodendrocyte precursor cells: immunocytochemical analysis. One day after plating OPCs were treated with 10  $\mu$ M co-ultramicrosized PEA/luteolin as detailed in Methods. Following a further 1 day and 4 days of incubation the cultures were paraformaldehyde-fixed and processed for myelin basic protein (MBP) and proteolipid protein (PLP) double immunocytochemistry as described in Methods. Note that no immunoreactivity for either protein was observed after 1 day, while both MBP (green) and PLP (red) immunostaining was seen after 4 days. The far-right column shows MBP and PLP co-reactivity in the cells at the later time point. Cells treated with co-ultramicrosized PEA/luteolin appeared to display a greater extent of branching (note halo of puncta). Scale bar: 30  $\mu$ m.

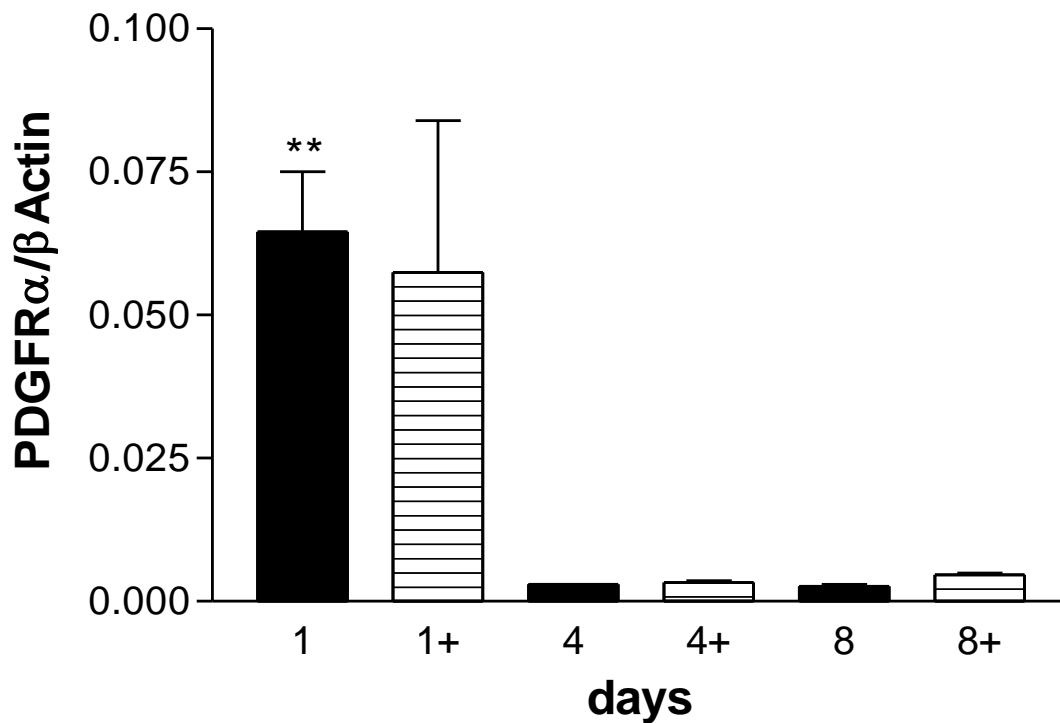

**Supplementary Figure S2.** Platelet-derived growth factor receptor alpha (PDGFR $\alpha$ ) gene expression diminishes with time in culture in differentiating OPCs. In this experiment parallel groups of cultures were treated with 10  $\mu$ M co-ultramicrosized PEA/luteolin (indicated by hatched bars and '+'); untreated cultures (0.02% Pluronic F-68 only) are indicated by solid bars. Cultures were harvested 1 day, 4 days and 8 days later and processed for RT-PCR, as detailed in Methods. Data are means  $\pm$  s.e.m. (n=3). \*\* $p$ <0.01 vs vehicle at day 4 and day 8. Co-ultramicrosized PEA/luteolin did not alter PDGFR $\alpha$  mRNA expression at any time point. Similar results were obtained in a second experiment. Note the drastic decrease ( $\sim$ 95%) in PDGFR $\alpha$  mRNA levels as the OPCs develop.

**Supplementary Table S1.** Co-ultramicrosized PEA/luteolin does not stimulate gene expression for the proliferation marker Ki-67 or cannabinoid receptors CB2 and CB1 in differentiating OPCs.

| Treatment | Treated/Control |                     |                     |
|-----------|-----------------|---------------------|---------------------|
|           | <i>Ki67</i>     | <i>CB2 receptor</i> | <i>CB1 receptor</i> |
| Control   | 1.000 ± 0.062   | 1.000 ± 0.025       | 1.000 ± 0.091       |
| PEALut    | 1.025 ± 0.092   | 0.947 ± 0.057       | 1.019 ± 0.136       |

Cultures of OPCs were treated the day after plating with 10 µM co-ultramicrosized PEA/luteolin ('PEALut'), as detailed in Methods. Cells were harvested 4 days later and processed for RT-PCR. Data are given with reference to vehicle (0.02% Pluronic F-68). Values are means ± s.e.m. (n=4).

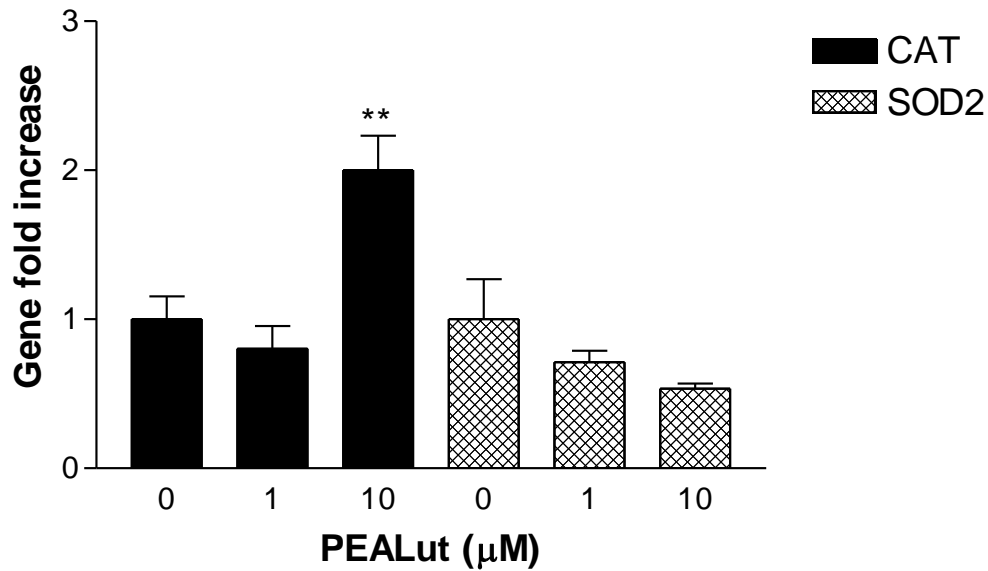

**Supplementary Figure S3.** Effect of co-ultramicrosized PEA/luteolin on catalase (CAT) and superoxide dismutase 2 (SOD2) mRNA expression in cortical oligodendrocytes.

Cultures at day 6 were incubated for 24 h with 1 and 10 μM co-ultramicrosized PEA/luteolin ('PEALut') and then processed for mRNA analysis by quantitative PCR, as detailed in Methods. Data are given with reference to vehicle (0.02% Pluronic F-68), set to 1, and are means  $\pm$  s.e.m. (n=3). \*\* $p < 0.01$  vs vehicle. Similar results were obtained in a second experiment.
